# Supplementary material for: Intersecting Identities: A Look at How Ethnic Identity Interacts With Science Identity in Native Hawaiian and Pacific Islander Students
Source: Atypon-hosted journal article supplement (doi:10.1187/cbe.23-01-0010), 2023-09-26
Supplement: combinedsupmats.pdf [file combinedsupmats.pdf]

# Supplemental Material

*CBE—Life Sciences Education*

Greenall *et al.*

## Supplementary Figure 1. CFA Results

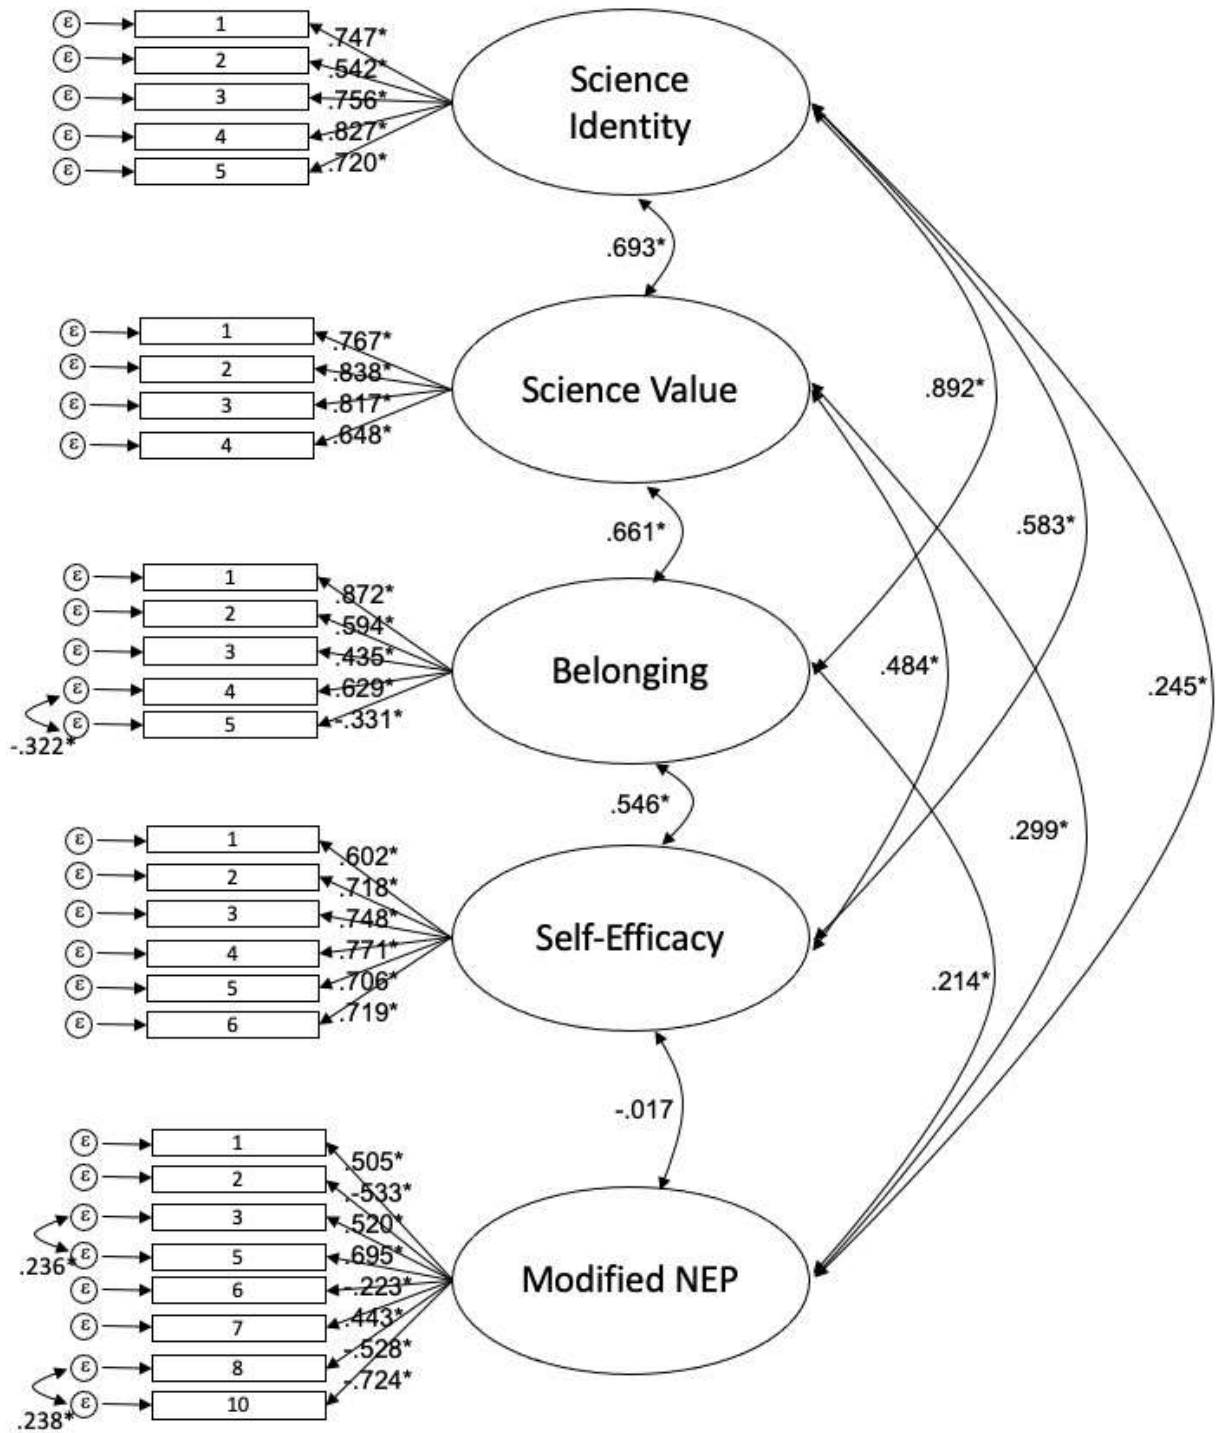

## Supplementary Survey 1: Pre-Survey

### Demographics

Q1.1 What is your gender?

- Female
- Male
- Non-binary/ third gender
- Prefer to self-describe \_\_\_\_\_
- Prefer not to say

Q1.2 How many semesters of college have you completed?

- 0 (this is my first semester)
- 1
- 2
- 3
- 4
- 5
- 6
- 7
- 8
- 9
- 10
- 11
- 12

Q1.3 What year were you born?\*

Q1.4 What is your declared major?\*

Q1.5 What is your current GPA?(If you are a 1st-semester freshman, provide your high school GPA) \_\_\_\_\_

Q1.6 How many Science classes have you taken in college?

- 0
- 1-2
- 3-5
- 6-8
- 9-10
- 10 or more

Q1.7 How many Science classes did you take in high school?

- 0
- 1-2
- 3-5
- 6-8
- 9-10
- 10 or more

Q1.8 What country were you born in?\*

Q1.9 What is your ethnicity? (choose all that apply)

- White
- Hispanic or Latino
- Black or African American
- Native American, American Indian, or Alaska Native
- Asian
- Native Hawaiian or Pacific Islander
- Other (please specify) \_\_\_\_\_

\*Questions with an asterisk (\*) were accompanied with a drop-down menu for students to choose an option. These were for birth year, declared major, and country of birth.

### **MEIM-R Scale**

*For the following questions: 1 = strongly disagree, 5 = strongly agree*

Q2 Regarding your \_\_\_\_\_\*\* identity, please indicate how much you agree with the following statements.

I have spent time trying to find out more about my ethnic group, such as its history, traditions, and customs.

1      2      3      4      5

I have a strong sense of belonging to my own ethnic group.

1      2      3      4      5

I understand pretty well what my ethnic group membership means to me.

1      2      3      4      5

I have often done things that will help me understand my ethnic background better.

1      2      3      4      5

I have often talked to other people in order to learn more about my ethnic group.

1      2      3      4      5

I feel a strong attachment towards my own ethnic group.

1      2      3      4      5

\*\*The blank was filled in with the ethnicity the student indicated in the previous question. A MEIM-R set of questions appeared for each ethnicity a student indicated, so if a student indicated Hispanic and Asian as their ethnicities, then they would have two sets of MEIM-R questions, one for their Hispanic identity and one for their Asian identity.

### Science Identity

*For the following questions: 1 = strongly disagree, 5 = strongly agree*

Q3 Please indicate how much you agree with the following statements.

I have a strong sense of belonging to the community of scientists.

1      2      3      4      5

I derive great personal satisfaction from working on a team that is doing important research.

1      2      3      4      5

I have come to think of myself as a “scientist”.

1      2      3      4      5

I feel like I belong in the field of science.

1      2      3      4      5

The daily work of a scientist is appealing to me.

1      2      3      4      5

### Identities

Q4.1 How does your ethnic identity influence your science identity?

- Conflicts a lot
- Conflicts a little
- Has no relationship
- Strengthens a little
- Strengthens a lot

Q4.2 Please explain your answer.

---

---

---

---

### Science Values

*Q5 Please rate how much the person in the description is like you. 0 = not like me at all, 1 = not like me, 2 = a little like me, 3 = somewhat like me, 4 = like me, and 5 = very much like me*

A person who thinks it is valuable to conduct research that builds the world's scientific knowledge.

0    1    2    3    4    5

A person who feels discovering something new in science is thrilling.

0    1    2    3    4    5

A person who thinks discussing new theories and ideas between scientists is important.

0    1    2    3    4    5

A person who thinks that scientific research can solve many of today's world challenges.

0    1    2    3    4    5

### **Intention to pursue science**

Q6 To what extent do you intend to pursue a science related research career?

Definitely will

Probably will

Might or might not

Probably will not

Definitely will not

### **Belongingness**

*For the following questions, 1 = strongly disagree and 7 = strongly agree*

Q7 Please indicate how much you agree with the following statements

When I am in a science setting, I feel a connection with the science community.

1    2    3    4    5    6    7

When I am in a science setting, I feel respected.

1    2    3    4    5    6    7

When I am in a science setting, I trust my instructors to be committed to helping me learn.

1    2    3    4    5    6    7

When I am in a science setting, I enjoy being an active participant.

1    2    3    4    5    6    7

When I am in a science setting, I try to say as little as possible. (reverse scored)

1    2    3    4    5    6    7

### **Self-Efficacy**

*For the following questions: 1 = not at all confident, 5 = absolutely confident*

Q8 Please indicate your confidence level in performing the following tasks.

Use technical science skills (use of tools, instruments, and/or techniques).

1      2      3      4      5

Generate a research question to answer.

1      2      3      4      5

Figure out what data/observations to collect and how to collect them.

1      2      3      4      5

Create explanations for the results of a study.

1      2      3      4      5

Use scientific literature and/or reports to guide research.

1      2      3      4      5

Develop theories (integrate and coordinate results from multiple studies).

1      2      3      4      5

### **Environmental attitudes**

*For the following questions: 1 = strongly disagree, 5 = strongly agree*

Q9 Please indicate how much you agree with the following statements.

We are approaching the limit of the number of people the earth can support.

1      2      3      4      5

Humans have the right to modify the natural environment to suit their needs

1      2      3      4      5

When humans interfere with nature it often produces disastrous consequences

1      2      3      4      5

**†Human ingenuity will ensure that we do NOT make the earth unlivable.**

**1      2      3      4      5**

Humans are severely abusing the environment.

1      2      3      4      5

The earth has plenty of natural resources if we just learn how to develop them.

1      2      3      4      5

Plants and animals have as much right as humans to exist

1      2      3      4      5

The balance of nature is strong enough to cope with the impacts of modern industrial nations

1      2      3      4      5

**†Despite our special abilities humans are still subject to the laws of nature**

**1      2      3      4      5**

The so-called “ecological crisis” facing humankind has been greatly exaggerated.

1 2 3 4 5

†Questions indicated were removed from NEP analysis due to CFA results.



## Supplementary Survey 2: Post-Survey

Q1. Did anything specific increase or decrease your science identity during the semester? Please explain.

---

---

---

---

### Identities

Q2.1 How does your ethnic identity influence your science identity?

- Conflicts a lot
- conflicts a little
- has no relationship
- strengthens a little
- strengthens a lot

Q2.2 Please explain your answer.

---

---

---

---

Q3.1 How does your ethnic identity influence your attitude towards conservation/the environment

- Conflicts a lot
- Conflicts a little
- Has no relationship
- Strengthens a little
- Strengthens a lot

Q3.2 Please explain your answer.

---

---

---

---

Q3.3 Would your answer to the previous question have been the same before this class? Please explain.

---

---

---

---

Q3.4 What other identities do you consider an important part of who you are? (Possible examples: cultural, political, religious, LGBTQ, familial, etc.)

---

---

---

---

Q3.5 Answer this question for each of your identities and please explain your answer. How does this influence your science identity?

- Conflicts a lot
- Conflicts a little
- Has no relationship
- Strengthens a little
- Strengthens a lot

Q3.6 Would your answer to the previous question have been the same before this class? Please explain.

---

---

---

---

### **Science Identity**

*For the following questions: 1 = strongly disagree, 5 = strongly agree*

Q4 Please indicate how much you agree with the following statements.

I have a strong sense of belonging to the community of scientists.

1      2      3      4      5

I derive great personal satisfaction from working on a team that is doing important research.

1      2      3      4      5

I have come to think of myself as a “scientist”.

1      2      3      4      5

I feel like I belong in the field of science.

1      2      3      4      5

The daily work of a scientist is appealing to me.

1      2      3      4      5

### Science Values

Q5 Please rate how much the person in the description is like you. 0 = not like me at all, 1 = not like me, 2 = a little like me, 3 = somewhat like me, 4 = like me, and 5 = very much like me

A person who thinks it is valuable to conduct research that builds the world's scientific knowledge.

0      1      2      3      4      5

A person who feels discovering something new in science is thrilling.

0      1      2      3      4      5

A person who thinks discussing new theories and ideas between scientists is important.

0      1      2      3      4      5

A person who thinks that scientific research can solve many of today's world challenges.

0      1      2      3      4      5

### Intention to pursue science

Q6 To what extent do you intend to pursue a science related research career?

- Definitely will
- Probably will
- Might or might not
- Probably will not
- Definitely will not

### Belongingness

For the following questions, 1 = strongly disagree and 7 = strongly agree

Q7 Please indicate how much you agree with the following statements

When I am in a science setting, I feel a connection with the science community.

1      2      3      4      5      6      7

When I am in a science setting, I feel respected.

1      2      3      4      5      6      7

When I am in a science setting, I trust my instructors to be committed to helping me learn.

1      2      3      4      5      6      7

When I am in a science setting, I enjoy being an active participant.

1      2      3      4      5      6      7

When I am in a science setting, I try to say as little as possible. (reverse scored)

1      2      3      4      5      6      7

### **Self-Efficacy**

*For the following questions: 1 = not at all confident, 5 = absolutely confident*

Q8 Please indicate your confidence level in performing the following tasks.

Use technical science skills (use of tools, instruments, and/or techniques).

1      2      3      4      5

Generate a research question to answer.

1      2      3      4      5

Figure out what data/observations to collect and how to collect them.

1      2      3      4      5

Create explanations for the results of a study.

1      2      3      4      5

Use scientific literature and/or reports to guide research.

1      2      3      4      5

Develop theories (integrate and coordinate results from multiple studies).

1      2      3      4      5

### **Environmental attitudes**

*For the following questions: 1 = strongly disagree, 5 = strongly agree*

Q9 Please indicate how much you agree with the following statements.

We are approaching the limit of the number of people the earth can support.

1      2      3      4      5

Humans have the right to modify the natural environment to suit their needs

1      2      3      4      5

When humans interfere with nature it often produces disastrous consequences

1      2      3      4      5

**†Human ingenuity will ensure that we do NOT make the earth unlivable.**

**1      2      3      4      5**

Humans are severely abusing the environment.

1      2      3      4      5

The earth has plenty of natural resources if we just learn how to develop them.

1      2      3      4      5

Plants and animals have as much right as humans to exist

1      2      3      4      5

The balance of nature is strong enough to cope with the impacts of modern industrial nations

1      2      3      4      5

†Despite our special abilities humans are still subject to the laws of nature

**1      2      3      4      5**

The so-called “ecological crisis” facing humankind has been greatly exaggerated.

1      2      3      4      5

†Questions indicated were removed from NEP analysis due to CFA results.

## Supplementary Table 1

### *Codebook Used for Qualitative Analysis*

| Category  | Code                        | Subcode                         | Example Response                                                                                                                           |
|-----------|-----------------------------|---------------------------------|--------------------------------------------------------------------------------------------------------------------------------------------|
| Community | desire to help              |                                 | I want to come and study science so I could go back and help my people.                                                                    |
|           | lack of support from        |                                 | I wish there was more acceptance or even understanding for me wanting to become a marine biologist.                                        |
|           | pressure from               |                                 | There is always a lot of pressure for the eldest to be very successful...                                                                  |
|           | privileged because of       |                                 | I am privileged to be able to say I have never had to think about my ethnicity in regards to my science identity.                          |
|           | representation of community |                                 | There are not many Polynesians in the field of science                                                                                     |
|           | support from                |                                 | My community really wants to see science majors who are Hawaiian succeed in this field so I do feel a firm sense of support in that regard |
| Country   | developed                   | opportunities                   | I have access to lots of tools to help me succeed scientifically.                                                                          |
|           | underdeveloped              | dependence on natural resources | ...the land provides for us, and in return, we must take care of the land                                                                  |
|           |                             | lack of scientific development  | Tonga is a very much [a] developing country and the thought of science is not needed for their development at the moment.                  |
|           |                             | push back against science       | ...many native Hawaiians don't agree with this and see it as desecration of values, beliefs, and an invasion of our homeland.              |
| Identity  | cultural                    |                                 | I don't any conflict between my culture and science                                                                                        |
|           | ethnic                      |                                 | My ethnic background turns my priority to studying and better understanding the                                                            |

|                               |                                     |                                                                                                                                                                                                   |
|-------------------------------|-------------------------------------|---------------------------------------------------------------------------------------------------------------------------------------------------------------------------------------------------|
|                               |                                     | environmental needs of the moana cultures.                                                                                                                                                        |
|                               | gender                              | Being the eldest Tongan daughter means a lot just attending university.                                                                                                                           |
|                               | political                           | I still feel American politics are drifting too far into areas they should not (like the scientific community).                                                                                   |
|                               | religious                           | everything has connection and explanation at a spiritual and scientific level                                                                                                                     |
| Important of Science Identity | important                           | I want to come and study science                                                                                                                                                                  |
|                               | lack of ID, no ID, ID not important | I don't really have a "science identity" because I am not heavily involved in science.                                                                                                            |
| Interactions                  | kept separate intentionally         | My two identities exist on [their] own.                                                                                                                                                           |
|                               | negative or conflicting             | My native Hawaiian background is rich with beliefs that contradict the facts that modern science has proven.                                                                                      |
|                               | neutral or no relationship          | My ethnicity has no relation to my science identity                                                                                                                                               |
|                               | positive or strengthening           | Because my Polynesian culture connects my people a lot with the earth, I think biology in particular has a close tie with my ethnicity. Respecting the earth makes me want to learn more about it |
|                               | unsure                              | I haven't really thought about that.                                                                                                                                                              |
| Motivations and Limitations   | limitations                         | As a Hawaiian, I am very attached to my home in the islands, and I am unwilling to let work move me abroad.                                                                                       |
|                               | motivations                         | It's survival that motivates me to pursue a meaning career and purpose.                                                                                                                           |
| Relationships                 | between environment and student     | The Polynesian culture is very strengthening seeing as our people care to protect our Oceans and our way of life.                                                                                 |
|                               | between human and student           | Science helps me see how people are scattered plus the way we live.                                                                                                                               |

|      |                                     |                                                                                                                                                 |
|------|-------------------------------------|-------------------------------------------------------------------------------------------------------------------------------------------------|
|      | ancestors                           | Science is applied to star navigation, although my ancestors used non instrumental navigation and way-finding.                                  |
|      | family                              | My family has a history of being biologists                                                                                                     |
|      | members of other races              | I have a lot of respect for non-Caucasian scientists and recognize every scientist's contribution.                                              |
|      | oneself                             | I am many things and to me it means I can do anything and be anything.                                                                          |
|      | other communities                   | ... more familiar with certain actions and behavior that we only Tahitians have comparing to other Polynesians.                                 |
|      | between science and student culture | Success in the Tongan culture is rarely seen as a scientist.                                                                                    |
|      | stereotypes                         | I personally don't believe that as a Samoan student, science was one of those subjects that we were encouraged to major in...                   |
|      | teaching, traditions, TEK           | My ethnic background turns my priority to studying and better understanding the environmental needs of the moana cultures.                      |
| Time | future                              | My future goal is to somehow use the knowledge that I have gained over the years to somehow help my people choose better, healthier lifestyles. |
|      | past                                | the circumstances in which I was brought up and started to pursue science.                                                                      |



## Supplementary Table 2

*Results of Multiple Linear Regression with Pre-Science Identity, Pre-Science Values, Pre-Self-Efficacy, Pre-Belonging, and Pre-NEP as Targets*

| Outcome Variable          | R <sup>2</sup> | Adjusted R <sup>2</sup> | Predictor                        | B (coefficient) | SE <sub>B</sub> | β (standardized coefficient) | p value |
|---------------------------|----------------|-------------------------|----------------------------------|-----------------|-----------------|------------------------------|---------|
| Pre-science identity      | 0.261          | 0.255                   | (Intercept)                      | 13.334          | 0.421           |                              | <0.001  |
|                           |                |                         | NHPI                             | -0.031          | 0.431           | -0.002                       | 0.942   |
|                           |                |                         | International                    | 0.058           | 0.352           | 0.006                        | 0.870   |
|                           |                |                         | Female                           | -0.284          | 0.251           | -0.037                       | 0.259   |
|                           |                |                         | # of High School Science Classes | 0.336           | 0.106           | 0.107                        | 0.002   |
|                           |                |                         | STEM major                       | 4.046           | 0.278           | 0.478                        | <0.001  |
|                           |                |                         | Female * NHPI                    | -1.014          | 0.877           | -0.038                       | 0.248   |
| Pre-science self-efficacy | 0.110          | 0.103                   | (Intercept)                      | 17.958          | 0.497           |                              | <0.001  |
|                           |                |                         | NHPI                             | -0.695          | 0.512           | -0.050                       | 0.175   |
|                           |                |                         | International                    | -0.596          | 0.421           | -0.053                       | 0.157   |
|                           |                |                         | Female                           | -01.356         | 0.298           | -0.163                       | <0.001  |
|                           |                |                         | # of High School Science Classes | 0.342           | 0.125           | 0.103                        | 0.006   |
|                           |                |                         | STEM major                       | 2.174           | 0.330           | 0.240                        | <0.001  |
|                           |                |                         | Female * NHPI                    | -0.382          | 1.042           | -0.013                       | 0.714   |
| Pre-science               | 0.159          | 0.152                   | (Intercept)                      | 13.833          | 0.400           |                              | <0.001  |

values

|                                 |       |       |                                  |        |       |        |        |
|---------------------------------|-------|-------|----------------------------------|--------|-------|--------|--------|
|                                 |       |       | NHPI                             | -0.732 | 0.412 | -0.064 | 0.076  |
|                                 |       |       | International                    | -0.184 | 0.337 | -0.020 | 0.585  |
|                                 |       |       | Female                           | -0.219 | 0.240 | -0.032 | 0.360  |
|                                 |       |       | # of High School Science Classes | 0.148  | 0.100 | 0.054  | 0.141  |
|                                 |       |       | STEM major                       | 2.824  | 0.266 | 0.367  | <0.001 |
|                                 |       |       | Female * NHPI                    | 0.383  | 0.838 | 0.016  | 0.648  |
| Pre-belonging                   | 0.166 | 0.158 | (Intercept)                      | 23.436 | 0.497 |        | <0.001 |
|                                 |       |       | NHPI                             | -0.597 | 0.512 | -0.042 | 0.244  |
|                                 |       |       | International                    | -0.521 | 0.419 | -0.045 | 0.214  |
|                                 |       |       | Female                           | -0.460 | 0.298 | -0.054 | 0.122  |
|                                 |       |       | # of High School Science Classes | 0.120  | 0.125 | 0.035  | 0.337  |
|                                 |       |       | STEM major                       | 3.622  | 0.330 | 0.387  | <0.001 |
|                                 |       |       | Female * NHPI                    | 1.167  | 1.042 | 0.039  | 0.263  |
| Pre-environmental concern (NEP) | 0.103 | 0.095 | (Intercept)                      | 23.763 | 0.593 |        | <0.001 |
|                                 |       |       | NHPI                             | 0.385  | 0.611 | 0.023  | 0.529  |
|                                 |       |       | International                    | -0.228 | 0.501 | -0.017 | 0.649  |
|                                 |       |       | Female                           | 2.787  | 0.355 | 0.283  | <0.001 |
|                                 |       |       | # of High School Science         | 0.118  | 0.149 | 0.030  | 0.427  |

Classes

|                  |       |       |       |        |
|------------------|-------|-------|-------|--------|
| STEM major       | 1.583 | 0.394 | 0.147 | <0.001 |
| Female *<br>NHPI | 0.697 | 1.242 | 0.021 | 0.575  |

### Supplementary Table 3

*Results of Multiple Linear Regression with Science Identity Change, Science Values Change, Self-efficacy Change, Belonging Change, and NEP Change as Targets*

| Outcome Variable             | R <sup>2</sup> | Adjusted R <sup>2</sup> | Predictor                        | B (coefficient) | SE <sub>B</sub> | β (standardized coefficient) | p value |
|------------------------------|----------------|-------------------------|----------------------------------|-----------------|-----------------|------------------------------|---------|
| Science identity change      | 0.146          | 0.136                   | (Intercept)                      | 6.098           | 1.034           |                              | <0.001  |
|                              |                |                         | NHPI                             | 1.216           | 0.970           | 0.054                        | 0.211   |
|                              |                |                         | International                    | 0.253           | 0.779           | 0.014                        | 0.745   |
|                              |                |                         | Female                           | 0.227           | 0.510           | 0.019                        | 0.656   |
|                              |                |                         | # of High School Science Classes | -0.848          | 0.293           | -0.126                       | 0.004   |
|                              |                |                         | STEM major                       | -4.394          | 0.562           | -0.334                       | <0.001  |
|                              |                |                         | Female * NHPI                    | 2.454           | 1.952           | 0.054                        | 0.209   |
| Science self-efficacy change | 0.050          | 0.038                   | (Intercept)                      | 2.779           | 1.085           |                              | 0.011   |
|                              |                |                         | NHPI                             | -0.036          | 1.033           | -0.002                       | 0.973   |
|                              |                |                         | International                    | -0.115          | 0.831           | -0.006                       | 0.890   |
|                              |                |                         | Female                           | 1.378           | 0.539           | 0.115                        | 0.011   |
|                              |                |                         | # of High School Science Classes | -0.432          | 0.307           | -0.065                       | 0.160   |
|                              |                |                         | STEM major                       | -2.132          | 0.594           | -0.163                       | <0.001  |
|                              |                |                         | Female * NHPI                    | 1.627           | 2.087           | 0.036                        | 0.436   |
| Science values change        | 0.138          | 0.128                   | (Intercept)                      | 5.026           | 0.807           |                              | <0.001  |
|                              |                |                         | NHPI                             | 1.149           | 0.769           | 0.065                        | 0.136   |

|                  |       |       |                                  |        |       |        |        |
|------------------|-------|-------|----------------------------------|--------|-------|--------|--------|
|                  |       |       | International                    | -0.030 | 0.618 | -0.002 | 0.962  |
|                  |       |       | Female                           | -0.243 | 0.400 | -0.026 | 0.544  |
|                  |       |       | # of High School Science Classes | -0.563 | 0.228 | -0.109 | 0.014  |
|                  |       |       | STEM major                       | -3.388 | 0.441 | -0.331 | <0.001 |
|                  |       |       | Female * NHPI                    | -0.648 | 1.553 | -0.018 | 0.676  |
| Belonging change | 0.095 | 0.084 | (Intercept)                      | 4.818  | 1.111 |        | <0.001 |
|                  |       |       | NHPI                             | 0.511  | 1.059 | 0.021  | 0.630  |
|                  |       |       | International                    | 0.457  | 0.852 | 0.024  | 0.592  |
|                  |       |       | Female                           | 0.385  | 0.551 | 0.031  | 0.486  |
|                  |       |       | # of High School Science Classes | -0.640 | 0.314 | -0.092 | 0.042  |
|                  |       |       | STEM major                       | -3.786 | 0.608 | -0.276 | <0.001 |
|                  |       |       | Female * NHPI                    | 0.555  | 2.138 | 0.012  | 0.795  |
| NEP change       | 0.051 | 0.039 | (Intercept)                      | 3.742  | 1.363 |        | 0.006  |
|                  |       |       | NHPI                             | -0.725 | 1.298 | -0.025 | 0.576  |
|                  |       |       | International                    | 0.440  | 1.044 | 0.020  | 0.674  |
|                  |       |       | Female                           | -2.992 | 0.676 | -0.199 | <0.001 |
|                  |       |       | # of High School Science Classes | 0.029  | 0.385 | 0.003  | 0.941  |
|                  |       |       | STEM major                       | -1.794 | 0.746 | -0.109 | 0.017  |
|                  |       |       | Female * NHPI                    | -2.265 | 2.621 | -0.039 | 0.388  |
